# Supplementary material for: Risk factors and prediction of second primary cancer in primary female non-metastatic breast cancer survivors
Source: publisher site journal article supplement (doi:10.18632/aging.103939), 2020-10-13
Supplement: Supplementary file [file aging-v12i19-103939-supplementary-material-SD1.pdf]

## SUPPLEMENTARY FIGURE

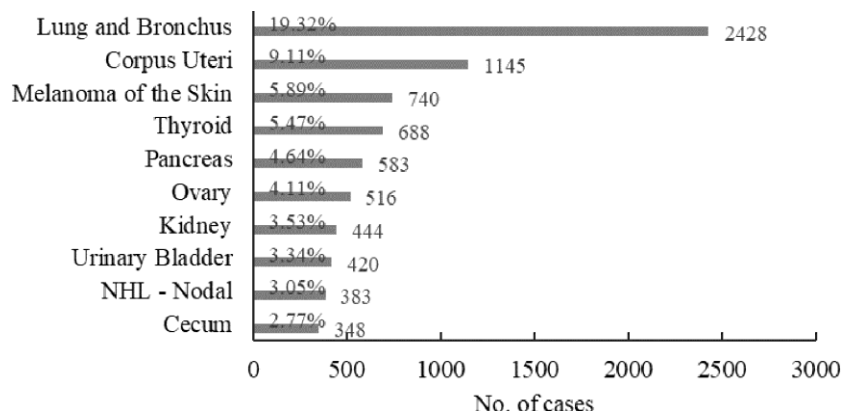

Supplementary Figure 1. The top-10 most commonly diagnosed sites of second primary non-BC.
